# Autotoxin-mediated voluntary triage in starved yeast community

Arisa H. Oda<sup>1,✉</sup>, Miki Tamura<sup>1</sup>, Kunihiro Kaneko<sup>1,2</sup>, Kunihiro Ohta<sup>1,2</sup>, and Tetsuhiro S. Hatakeyama<sup>1,✉</sup>

<sup>1</sup>Department of Basic Science, University of Tokyo, 3-8-1 Komaba, Meguro-ku, Tokyo 153-8902, Japan

<sup>2</sup>Research Center for Complex Systems Biology, Universal Biology Institute, 3-8-1 Komaba, Meguro-ku, Tokyo 153-8902, Japan

When organisms face crises, such as starvation, every individual should adapt to environmental changes (1, 2), or the community alters their behaviour (3–5). Because a stressful environment reduces the carrying capacity (6), the population size of unicellular organisms shrinks in such conditions (7, 8). However, the uniform stress response of the cell community may lead to overall extinction or severely damage their entire fitness. How microbial communities accommodate this dilemma remains poorly understood. Here, we demonstrate an elaborate strategy of the yeast community against glucose starvation, named the voluntary triage. During starvation, yeast cells release some autotoxins, such as leucic acid and L-2keto-3methylvalerate, which can even kill the cells producing them. Although it may look like mass suicide at first glance, cells use epigenetic “tags” to adapt to the autotoxin inheritably. If non-tagged latecomers, regardless of whether they are closely related, try to invade the habitat, autotoxins kill them and inhibit their growth, but the tagged cells can selectively survive. Phylogenetically distant fission and budding yeast (9) share this strategy using the same autotoxins, which implies that the universal system of voluntary triage may be relevant to the major evolutionary transition from unicellular to multicellular organisms (10).

Correspondence: [hatakeyama@complex.c.u-tokyo.ac.jp](mailto:hatakeyama@complex.c.u-tokyo.ac.jp), [odar@bio.c.u-tokyo.ac.jp](mailto:odar@bio.c.u-tokyo.ac.jp)

## Introduction

In a crisis, such as starvation, organisms should adapt at both individual (1, 2) and population levels (3–5). In unicellular organisms, the former has been intensively studied as an adaptation phenomenon (11–13), whereas the latter is poorly understood. Severe conditions decrease the carrying capacity (6), and unicellular organisms have to decrease the population size (7, 8). However, such an adjustment in cell number carries the risk of killing clonal cells. Thus, how cellular communities adapt to crisis without decreasing the fitness of clonal cells remains unknown.

Here, we report an elaborate survival strategy in crisis, named a voluntary triage. When the fission yeast, *Schizosaccharomyces pombe*, is cultured in glucose-limited conditions, where the carrying capacity is expected to decrease, cells release toxic molecules into the medium. Surprisingly, such a medium kills

30 even the clonal cells of the toxin-producing cells when they are transferred from glucose-rich conditions.  
 31 This may look like mass suicide at first glance. However, cells precultured in starved conditions continue  
 32 to grow even in the conditioned medium, as they tag themselves to adapt to the toxins through starvation,  
 33 and such adapted state is inheritable. In other words, cells autonomously differentiate into two types,  
 34 adapted and non-adapted ones, and the cellular community selectively saves the former, just like triage  
 35 in emergency medical care. Such voluntary triage works as a competitive strategy against both closely  
 36 related and distant species. Starved yeast cells release toxins, which prevent an invasion of latecomers  
 37 by killing them, as the Greek philosopher argued: the plank of Carneades (14). Surprisingly, the same  
 38 strategy was seen in budding yeasts, which are phylogenetically distant relatives to the fission yeast (9).  
 39 Indeed, we identified the same toxic molecules from both media conditioned by fission and budding yeast.  
 40 Therefore, we hypothesised that the voluntary triage is evolutionarily conserved in fungal microbes.

## 41 Results

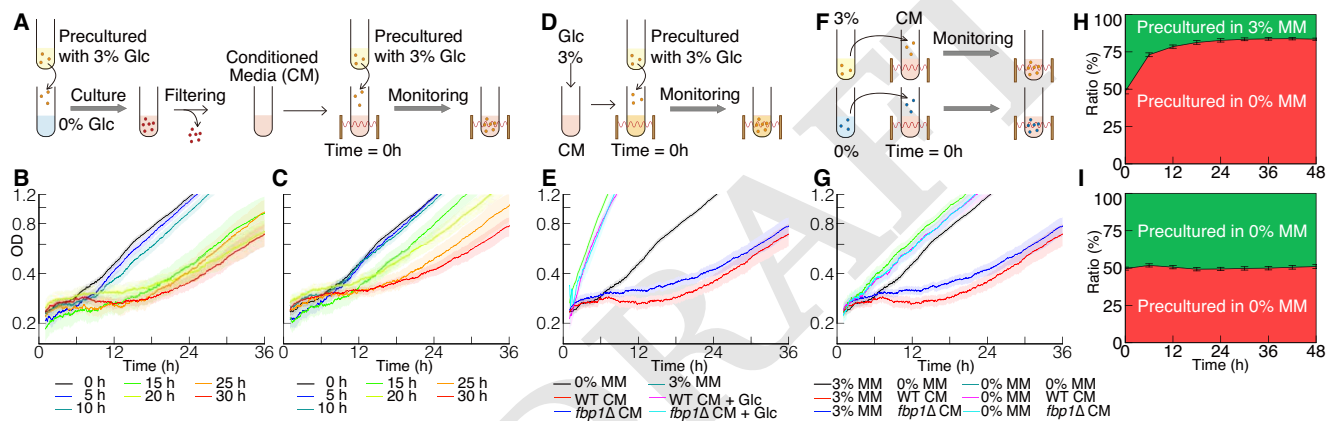

**Fig. 1. Conditioned media caused a delay phase during glucose starvation.** A) Schematic illustration of the experimental procedure for (B) and (C). B and C) Growth curves of wild type (WT) cells in (B) WT- or (C) *fbp1*Δ cell-conditioned media (CM) without glucose. Different coloured lines indicate a moving average of optical density (OD) measured every minute in CM with different incubation times. Each line is an average of  $n \geq 10$  samples, and the pale-coloured area indicates the standard error of the mean (SEM). D) Schematic illustration of the experimental procedure for (E). E) Growth curves of WT cells in CM with 3% glucose. Each line represents an average of  $n \geq 7$  samples. F) Schematic illustration of the experimental procedure for (G). G) Growth curves of WT cells, precultured without glucose, in the CM. Each line represents an average of  $n \geq 7$  samples. H and I) Competition assay in WT CM (H) between the cells precultured in 3 and 0% minimal media (MM) and (I) between the cells precultured in 0% MM. Green and red areas indicate the fraction of mNeonGreen- and mCherry-labelled cells, respectively, and overwriting outline characters indicate preculture conditions. Black vertical bars between two areas indicate SEM (number of each sample is 12).

42 To detect interactions in the population, we prepared conditioned media (CM) by culturing wild type (WT)  
 43 fission yeast *S. pombe* for 30 h in the minimal media (MM) without glucose (0% MM) (see Fig. 1A for  
 44 detailed procedure). We refer to this medium as the WT CM. When cells, which had been precultured in  
 45 the MM with 3% glucose (3% MM), were cultured in the WT CM, they stopped growing for approximately  
 46 20 h and then resumed growing (see the red line in Fig. 1B). We termed this prolonged lag phase as the  
 47 delay phase (see Supplementary Note 1 for measurement of the delay phase). If incubation time to prepare

48 CM was longer than 15 h, such media also induced the delay phase, while shorter incubation time did not  
49 introduce such a phase (Fig. 1B). This indicated that in the early growth phase, cells released inhibitors  
50 for growth or depleted some of the nutrients required for such a phase.

51 To determine whether cells release inhibitors or deplete essential nutrients, we constructed a conditioned  
52 medium using a 1,6 bis-phosphatase deletion mutant (*fbp1*Δ), which did not have a functional gluconeo-  
53 genetic pathway (15). Such a mutant strain could not grow without glucose (Fig. S1 and (16, 17)) and was  
54 expected not to consume the nutrients required for growth. The CM made using *fbp1*Δ cells (*fbp1*Δ CM)  
55 also caused the delay phase (Fig. 1C), as shown with the WT CM. This suggested that the delay phase  
56 resulted from the release of inhibitory molecules by cells rather than the depletion of nutrients.

57 In addition, when we administered a sufficient concentration of glucose to the CM (Fig. 1D) to recover  
58 the carrying capacity, cellular growth was not disrupted, and the delay phase was not observed, i.e., the  
59 growth curve of cells in such media was almost the same as that of those in MM with glucose (Fig. 1E).  
60 This indicated that inhibitory molecules in the CM worked only in the absence of glucose.

61 After the delay phase, the growth rate in the CM returned to almost the same level as in the MM. This  
62 suggested that the cells adapted to inhibitory molecules in the CM, and such an adapted state was expected  
63 to be inheritable. To verify the existence of the adapted state of cells, we precultured cells in the 0% MM  
64 and measured their growth in WT and *fbp1*Δ CM (Fig. 1F), and then no delay phase was observed  
65 (Fig. 1G). Furthermore, to verify whether adaptation to the inhibitory compound was due to genetic  
66 or epigenetic changes, we precultured cells that survived in the CM in unstarved condition, and again,  
67 cultured them in the CM; they showed a delay phase (Fig. S2). Moreover, we performed gDNA-seq of  
68 surviving cells and identified no unique SNPs and InDels, except for highly repetitive sequence loci, such  
69 as telomeres and centromeres (see Fig. S3 and Supplementary Note 2 for details). This indicated that the  
70 adapted cell was “tagged” epigenetically.

71 Plausible evolutionary significance of the release of inhibitory molecules and adapting to them is the  
72 inhibition of growth of different lineages of cells. When sugars around cells are depleted, they start  
73 to release inhibitory molecules while simultaneously adapting to such inhibitors. Then, the modified  
74 environment will inhibit the growth of latecomers, even if they are closely related. We performed a  
75 competition assay by artificially mimicking the above conditions; we simultaneously added cells that were  
76 precultured in glucose-rich and glucose-poor media into the CM with an equal amount in the beginning  
77 and observed their population dynamics (Figs. S4). Then, the fraction of adapted cells to unadapted  
78 cells continued to increase for 24 h and reached a steady-state (Figs. 1H and S5A), while the fifty-fifty  
79 ratio was maintained in the competition assay between adapted cells (Figs. 1I and S5B). In addition, the

80 steady-state ratio of adapted and unadapted cells agreed with the ratio predicted from the growth curve  
 81 observed in fresh and conditioned media in Fig. 1G (see also Supplementary Note 3). This implied that  
 82 the combination of inhibitor release and adaptation caused population dynamics shown in Figs. 1H and I  
 83 and selected the offspring of inhibitor-producing cells to survive.

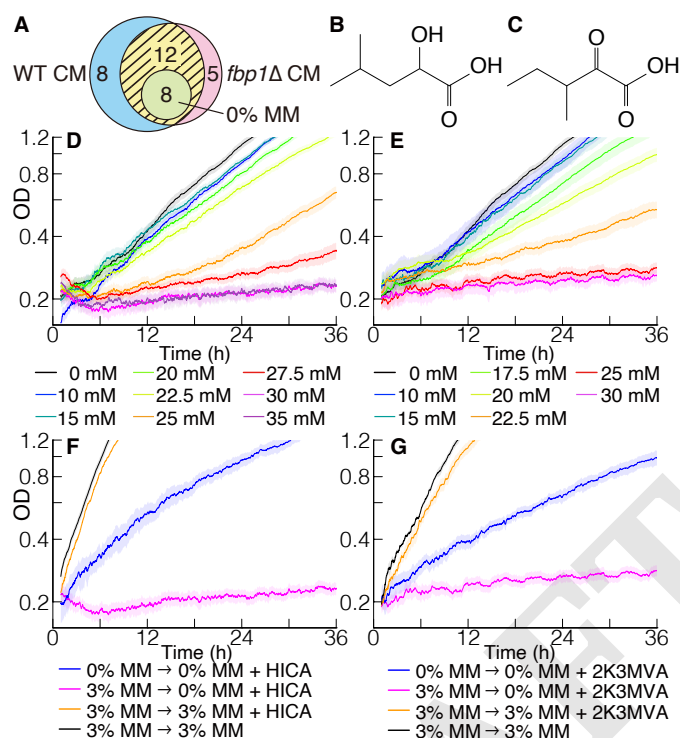

**Fig. 2. Identification of growth inhibitors.** A) Venn diagram of compounds detected using capillary electrophoresis mass spectrometry (CE-MS). Compounds in 0% minimal media (MM), wild type (WT) conditioned media (CM), and *fbp1Δ* CM were analysed. Twenty compounds were detected in both WT and *fbp1Δ* CM, and eight of those were also detected in 0% MM. Thus, 12 compounds (yellow hatching area) were detected uniquely in both CM (see Supplementary Table 1 for details of the detected molecules). B and C) The structure of (B) HICA and (C) 2K3MVA. D and E) Growth curves in 0% MM in the presence of (D) HICA and (E) 2K3MVA. WT cells precultured in 3% MM were transferred to 0% MM with various concentrations of the inhibitory compound at 0 h. Each line represents the average of  $n \geq 6$  samples. F and G) Effects of adaptation and glucose administration on growth curves in the presence of (F) 30 mM HICA or (G) 25 mM 2K3MVA. The blue line indicates the growth curve of WT cells precultured in 0% MM in 0% MM with the inhibitory compound. The orange line is a growth curve of WT cells in MM with the inhibitory compound and 3% glucose. The pink and black lines indicate growth curves in 0% MM with the inhibitory compound and 3% MM as controls, respectively. Each line represents an average of  $n \geq 4$  samples.

84 The characteristics of the inhibitory molecules observed in the CM helped us isolate them. First, we iden-  
 85 tified chemical compounds in the freshly prepared MM as well as WT and *fbp1Δ* CM using capillary  
 86 electrophoresis mass spectrometry (CE-MS). We identified 20 chemical compounds. From these candi-  
 87 dates, we chose 12 chemicals that were included in both CM but not the fresh medium (see the yellow  
 88 hatching region in the Venn diagram in Fig. 2A), because both CM initiated the delay phase. We further  
 89 narrowed down 12 molecules by adding them to the MM according to the following criteria: 1) They did  
 90 not change the growth rate significantly after the delay phase. 2) They had little effect on growth in the  
 91 presence of glucose. 3) They caused a shorter delay phase in cells that had already adapted to starvation.  
 92 Finally, we isolated two small molecules with similar structures: Leucic acid (HICA, Fig. 2B) and L-

93 2Keto-3methylvalerate (2K3MVA, Fig. 2C). Note that some of the molecules in the candidate list were  
 94 difficult to obtain commercially and could not be tested.  
 95 The two inhibitory molecules had similar characteristics. When the concentration of these molecules was  
 96 not sufficient, we never observed the delay phase (Figs. 2D and E). Then, the more we administrated the  
 97 inhibitors, the longer the delay phase was. Finally, if the concentration was higher than the critical con-  
 98 centrations (30 mM for HICA and 25 mM for 2K3MVA), cell growth was thoroughly repressed. Notably,  
 99 there are two optical isomers of HICA, both of which caused a growth delay at the same concentration  
 100 (Fig. S6). When glucose was added to the MM simultaneously with inhibitory molecules, cell growth was  
 101 not disrupted (see the orange line in Figs. 2F and G). Moreover, even under the administration of such  
 102 high concentration where cells stopped growing, cells that had been adapted to glucose starvation grew  
 103 (see blue line in Figs. 2F and G). These correspondences of inhibitory molecules with the CM implied that  
 104 the release of HICA and 2K3MVA was one of the causes of voluntary triage during glucose starvation.

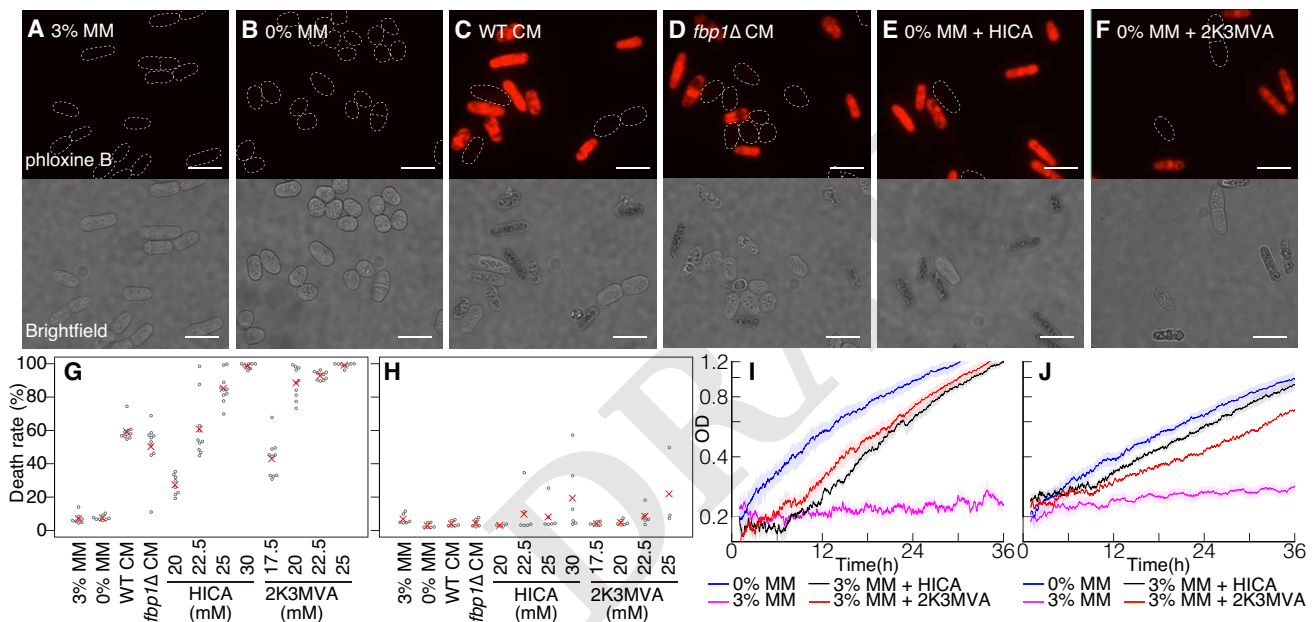

**Fig. 3. Identified molecules kill cells and also facilitate cell adaptation to the molecule.** A–F) Fluorescent (upper) and brightfield (bottom) microscopic images of wild type (WT) cells in various media. Cells precultured in 3% minimal media (MM) were transferred to (A) 3% MM, (B) 0% MM, (C) WT conditioned media (CM), (D) *fbp1*Δ CM, (E) 0% MM with 25 mM HICA, and (F) 22.5 mM 2K3MVA. In fluorescent microscopic images, dead cells were stained with Phloxine B. Scale bar indicates 10 μm. G and H) The dyed cell ratio after 8 h of incubation. Cells were precultured in (G) 3% MM (n = 8-10) or (H) 0% MM (n = 3-6). Grey dots represent the dyed cell ratio in each sample, and red crosses represent the mean value. I and J) Growth curves of cells precultured in the presence of one of the inhibitory molecules along with 3% glucose, in 0% MM with (I) 30 mM HICA or (J) 25 mM 2K3MVA. Cells were precultured in 0% MM (blue line), 3% MM (pink line), 3% MM with 30 mM HICA (black line), and 3% MM with 25 mM 2K3MVA (red line).

105 How do the inhibitory molecules cause the delay phase? There are two possible mechanisms: Delay of  
 106 initiation of growth in each cell or death of the majority of cells. In the latter, the concentration of living  
 107 cells is masked by that of dead cells in the OD measurement, and an apparent delay phase will be observed  
 108 until the concentration of living cells exceeds that of dead cells red(see Supplementary Note 4 and Fig.



109 S7). To verify which hypothesis is correct, we counted the number of dead cells by staining them with  
110 phloxine B, a red dye, often used to check yeast viability (18) (Figs. 3A–H). Then, over 80% of cells,  
111 which were cultured in the presence of a higher concentration of inhibitory molecules, were dyed in red  
112 (Figs. 3G and H). Indeed, the majority of cells during the delay phase were stained red and showed a  
113 typical rod shape, as observed under a microscope, which are characteristics of dead cells (19, 20) (Figs.  
114 3E and F). In contrast, only a small number of cells showed a spherical shape similar to cells cultured in  
115 MM without glucose. This indicated that only a small portion of the cells survived and continued to divide  
116 in the presence of inhibitory molecules. Similarly, the death rate in WT and *fbp1*Δ CM increased (Figs.  
117 3B, C, and G). Furthermore, cells precultured in the starved condition, which did not show a delay phase  
118 in the presence of the inhibitory molecules, were mostly alive (Fig. 3H). This suggested that HICA and  
119 2K3MVA induced cell death, which was the primary cause of the delay phase (see also Supplementary  
120 Note 4, Figs. S8 and S9).

121 Note that the identified toxins also facilitate cell adaptation in a condition-dependent manner. When we  
122 precultured cells in 3% MM with an inhibitory molecule, HICA or 2K3MVA, they grew in 0% MM with a  
123 sufficiently high concentration of inhibitory molecules that stopped the growth of non-adapted cells (Figs.  
124 3I and J). This indicated that the molecules we identified had two distinguishable effects: To kill starving  
125 cells and help non-starving cells to adapt. We also characterized the gene expression pattern in inhibitory  
126 molecule-adapted cells, and confirmed that the metabolic state of cells grown in the presence of both  
127 glucose and inhibitory molecules was different from that of those grown in glucose starvation and as close  
128 to that of those grown in 3% MM (see Supplementary Note 5 and Fig. S10).

129 Voluntary triage is not a unique characteristic of *S. pombe* but is widely observed in unicellular fungi. We  
130 cultured two strains of budding yeast *Saccharomyces cerevisiae*, which are phylogenetically distant from  
131 *S. pombe*, and prepared CM using them. Then, we found that such CM also initiated the delay phase in  
132 the growth of media producers (Figs. 4A and S11A). Moreover, we detected the same toxic molecules,  
133 HICA and 2K3MVA, in the media conditioned with *S. cerevisiae*. In addition, the administration of such  
134 toxins to a MM without glucose initiated the delay phase in a concentration-dependent manner (Figs. 4B,  
135 C, and S11B and C). Cells precultured in the starved condition did not show delay phase in their CM or  
136 0% MM with an inhibitory molecule (Figs. 4D, E, S11D, and E). This suggested that the same strategy  
137 with the same molecules, as observed in *S. pombe*, was evolutionarily conserved among distant species.  
138 In addition, media conditioned with distant species also initiated the delay phase (Figs. 4F, G, and H), i.e.,  
139 media conditioned with *S. pombe* inhibited the growth of *S. cerevisiae* and vice versa. Therefore, such a  
140 strategy was universally effective from closer to distant species.

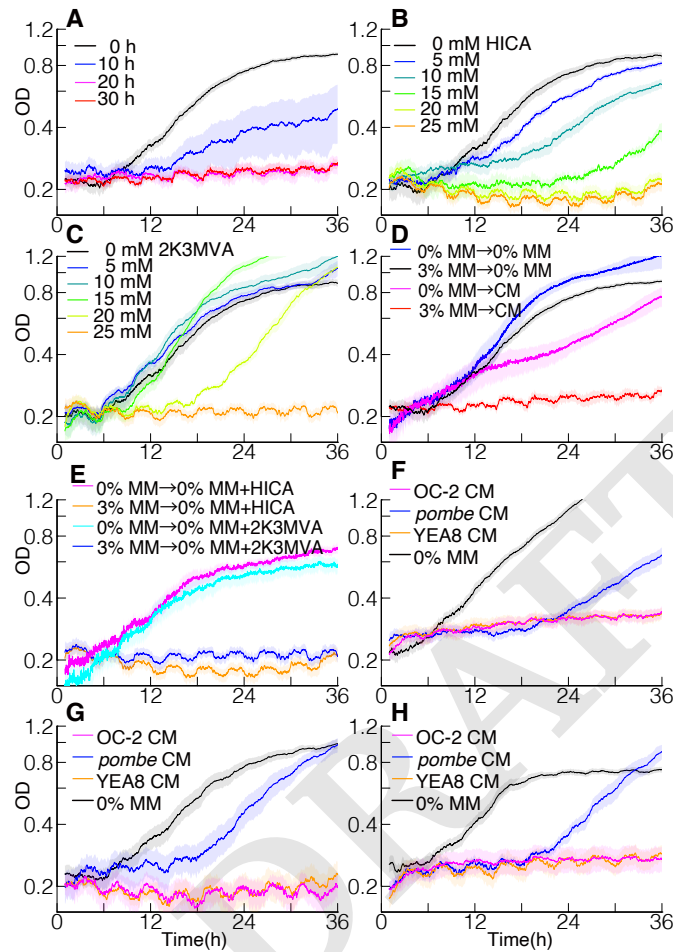

**Fig. 4. Media conditioned with various strains of yeasts initiated the delay phase.** A) Growth curves of *S. cerevisiae* (OC-2) cells in media conditioned with themselves. Different coloured Lines indicate growth curves of conditioned media (CM) at different incubation times. Each line represents an average of  $n \geq 6$  samples. B) Growth curves of OC-2 in 0% minimal media (MM) with various concentrations of HICA. Each line represents an average of  $n \geq 5$  samples. C) Growth curves of OC-2 in 0% MM with various concentrations of 2K3MVA. Each line represents an average of  $n \geq 5$  samples. D) Growth curves of OC-2 precultured in 0 or 3% MM in OC-2 CM. Each line represents an average of  $n \geq 6$  samples. E) Growth curves of OC-2 precultured in 0 or 3% MM in 0% MM with 25 mM HICA or 25 mM 2K3MVA. Each line represents an average of  $n \geq 6$  samples. F, G, and H) Growth curves of (F) *S. pombe*, (G) OC-2, and (H) YEA8 in media conditioned with *S. pombe*, OC-2, or YEA8 for 30 h. Each line represents an average of  $n \geq 6$  samples.

## 141 Discussion

142 In this paper, we reported a new ecological strategy for microbes; the voluntary triage. It seems similar to  
143 the toxin-antitoxin system, such as bacteriocins in bacteria (21, 22) and killer factors in yeast (23, 24) and  
144 paramoecium (25) but it is fundamentally different. Although the toxin-antitoxin system does not kill the  
145 clonal cells (26), the voluntary triage kills even the clonal cells if they have not been adapted to toxins.  
146 Such a strategy, appearing as a suicide at first glance, helps the yeast to select an appropriate offspring  
147 that produces toxins and selfishly purify their genome from closely related species. Moreover, voluntary  
148 triage overcomes the problems of the toxin-antitoxin system. In such a system, toxin producers should  
149 continuously produce antitoxins to protect themselves, and the maintenance of this state is a heavy burden  
150 for them (27). Thus, the toxin producer is lost to a cheater, which only has the antitoxin system, whereas  
151 the cheater loses to cells having neither any toxin nor immunity (28). In contrast, the voluntary triage does  
152 not cost much because the adaptation mechanism is usually offered without the toxin. This suggests that  
153 voluntary triage is resistant to cheaters.

154 We found that distant yeast species universally conserved voluntary triage, even at the molecular level.  
155 This might be because the toxins in the reported system are simple molecules, while toxins in the toxin-  
156 immunity systems in bacteria and yeast are highly evolved proteins. In the bacteriocin system of *Es-*  
157 *cherichia coli*, toxins and receptors set off an arms race between the diversification of toxins and en-  
158 hancement of their recognition by modifying the structure of proteins (29). In contrast, in the voluntary  
159 triage, the targets of toxins are insensitive to the detailed structure of molecules and are not specific re-  
160 ceptors. Indeed, the enantiomers of HICA have the same activity, where both D- and L-forms of HICA  
161 cause the delay phase at the same concentration (Fig. S6). Moreover, HICA was first identified from  
162 fermented products of a bacterium, *Lactobacillus plantarum* (30), and is toxic to various bacterial species  
163 and *Candida* and *Aspergillus* species (31). This suggests that HICA and 2K3MVA targets are universally  
164 conserved pathways. Therefore, the toxins we found were effective against a range of cells; from clones  
165 to distant species.

166 The voluntary triage we reported might play an important role in understanding the origin of multicellu-  
167 larity. Multicellular fungi fall into clades 8–11, while there are only four clades apart from fungi (32, 33),  
168 indicating that transitions from unicellular to multicellular and multicellular to unicellular organisms oc-  
169 cur easily in fungi. To form a complex multicellular body, mutual activation of growth, as well as growth  
170 inhibition and programmed cell death pathway, are essential (34). Thus, the evolutionary origin or vestige  
171 of both mutual activation and inhibition of growth should be observed even in unicellular fungi. Indeed,



172 multiple species of unicellular fungi have the former as quorum sensing (35). However, the latter has  
173 not been reported. The mechanism we found here meets the criteria required for growth inhibition for  
174 multicellularity (36, 37), that is, the toxins cause cell death depending on the cell state and smoothly dif-  
175 fuse from cell to cell. A recent artificial evolution experiment demonstrated that multicellular “snowflake”  
176 yeast repeatedly evolved 15 times from unicellular *S. cerevisiae* and showed apoptosis to keep the original  
177 size constant (38). This suggests that the origin or vestige of multicellularity is embedded in the uncel-  
178 lular yeast. The relationship between intercellular communication in unicellular cells and multicellularity  
179 is key to solving the enigma of major transitions in evolution (10), and our study provides a significant  
180 milestone.

## 181 References

- 182 1. Takeshige, K., Baba, M., Tsuboi, S., Noda, T., & Ohsumi, Y. Autophagy in yeast demonstrated with proteinase-deficient mutants and conditions for its induction. *The Journal of Cell Biology* **119**, 2,  
183 301-311 (1992)
- 184 2. Barkai, N., & Leibler, S. Robustness in simple biochemical networks. *Nature* **387**, 6636, 913-917 (1997)
- 185 3. Nguyen, D. et al. Active starvation responses mediate antibiotic tolerance in biofilms and nutrient-limited bacteria. *Science* **334**, 6058, 982-986 (2011)
- 186 4. Aertsen, A., & Michiels, C. W. Stress and how bacteria cope with death and survival. *Critical Reviews in Microbiology* **30**, 4, 263-273 (2004)
- 187 5. Opalek, M., & Wloch-Salamon, D. Aspects of Multicellularity in *Saccharomyces cerevisiae* Yeast: A Review of Evolutionary and Physiological Mechanisms. *Genes* **11**, 6, 690 (2020)
- 188 6. Monod, J. The growth of bacterial cultures. *Annual review of Microbiology* **3**, 1, 371-394 (1949)
- 189 7. Bren, A., Hart, Y., Dekel, E., Koster, D., & Alon, U. The last generation of bacterial growth in limiting nutrient. *BMC Systems Biology* **7**, 1, 1-9 (2013)
- 190 8. Kjelleberg, S. (Ed.) *Starvation in bacteria*. (New York: Plenum Press, 1993)
- 191 9. Kurtzman, C. P., & Robnett, C. J. Phylogenetic relationships among yeasts of the ‘*Saccharomyces complex*’ determined from multigene sequence analyses. *FEMS Yeast Research* **3**, 4, 417-432  
192 (2003)
- 193 10. Smith, J. M., & Szathmáry, E. *The major transitions in evolution*. (Oxford University Press, 1997)
- 194 11. Gurvich, Y., Leshkowitz, D., & Barkai, N. Dual role of starvation signaling in promoting growth and recovery. *PLoS Biology* **15**, 12, e2002039 (2017)
- 195 12. Hohmann, S., & Mager, W. H. (Eds.). *Yeast Stress Responses, Vol. 1*. (Springer Science & Business Media, 2007)
- 196 13. Huang, W. P., & Klionsky, D. J. Autophagy in yeast: a review of the molecular machinery. *Cell Structure and Function* **27**, 6, 409-420 (2002)
- 197 14. Cicero, M. T. *De officiis, Book 3, Part 89*. (transl. Brutus: On the Nature of the Gods. On Divination. On Duties.) (University of Chicago Press, 1950)
- 198 15. Hoffman, C. S., & Winston, F. Isolation and characterization of mutants constitutive for expression of the *fbp1* gene of *Schizosaccharomyces pombe*. *Genetics* **124**, 4, 807-816 (1990)
- 199 16. Matsuzawa, T., Hara, F., Tohda, H., Uemura, H., & Takegawa, K. Promotion of glycerol utilization using ethanol and 1-propanol in *Schizosaccharomyces pombe*. *Applied Microbiology and*  
200 *Biotechnology* **95**, 2, 441-449 (2012)
- 201 17. Malecki, M. et al. Functional and regulatory profiling of energy metabolism in fission yeast. *Genome biology* **17**, 1, 1-18 (2016)
- 202 18. Nagai S. Diagnostic Color Differentiation Plates for Hereditary Respiration Deficiency in Yeast. *Journal of bacteriology* **86**, 2, 299-302 (1963)
- 203 19. Middelhoven, W. J., Broekhuizen, B., & van Eijk, J. Detection, with the dye phloxine B, of yeast mutants unable to utilize nitrogenous substances as the sole nitrogen source. *Journal of Bacteriology*  
204 **128**, 3, 851-852 (1976)
- 205 20. Noda, T. Viability assays to monitor yeast autophagy. *Methods in Enzymology* **451**, 27-32 (2008)
- 206 21. Kommineni, S. et al. Bacteriocin production augments niche competition by enterococci in the mammalian gastrointestinal tract. *Nature* **526**, 7575, 719-722 (2015)
- 207 22. Gratia, A. Sur un remarquable exemple d'antagonisme entre deux souches de colibacille. *C.R. Seances Soc. Biol. Fil.* **93**, 1040-1041 (1925)
- 208 23. Bevan, E. A. The physiological basis of the killer character in yeast. *Proc. 11th Int. Cong. Gene* **1**, 202-203 (1963)
- 209 24. Hara, S. et al. The breeding of cryophilic killer wine yeasts. *Agricultural and Biological Chemistry* **45**, 6, 1327-1334 (1981)
- 210 25. Sonneborn, T. M. Mating types in *Paramecium aurelia*: diverse conditions for mating in different stocks; occurrence, number and interrelations of the types. *Proceedings of the American Philosophical*  
211 *Society* **79**, 3, 411-434 (1938)
- 212 26. Riley, M. A., & Wertz, J. E. Bacteriocins: evolution, ecology, and application. *Annual Reviews in Microbiology* **56**, 1, 117-137 (2002)
- 213 27. Kerr, B., Riley, M. A., Feldman, M. W., & Bohannan, B. J. Local dispersal promotes biodiversity in a real-life game of rock-paper-scissors. *Nature* **418**, 6894, 171-174 (2002)
- 214 28. Kirkup, B. C., & Riley, M. A. Antibiotic-mediated antagonism leads to a bacterial game of rock-paper-scissors in vivo. *Nature*, **428**, 6981, 412-414 (2004)
- 215 29. Riley, M. A. Molecular mechanisms of bacteriocin evolution. *Annual review of genetics* **32**, 1, 255-278 (1998)
- 216 30. Hietala, P. K., Westermarck, H. W., & Jaarma, M. Identification of antimicrobial alpha-hydroxyacids in *Lactobacillus plantarum*-fermented animal protein. *Annals of Nutrition and Metabolism* **23**, 3,  
217 227-234 (1979)
- 218 31. Sakko, M. et al. 2-hydroxyisocaproic acid is fungicidal for *Candida* and *Aspergillus* species. *Mycoses* **57**, 4, 214-221 (2014).
- 219 32. Nagy, L. G., Kovács, G. M., & Krizsán, K. Complex multicellularity in fungi: evolutionary convergence, single origin, or both?. *Biological Reviews* **93**, 4, 1778-1794 (2018)

- 220 33. Niklas, K. J., & Newman, S. A. The origins of multicellular organisms. *Evolution & development* **15**, 1, 41-52 (2013)
- 221 34. Ameisen, J. C. On the origin, evolution, and nature of programmed cell death: a timeline of four billion years. *Cell Death & Differentiation* **9**, 4, 367-393 (2002)
- 222 35. Neilson, K. H., Platt, T., & Hastings, J. W. Cellular control of the synthesis and activity of the bacterial luminescent system. *Journal of Bacteriology* **104**, 1, 313-322 (1970)
- 223 36. Koonin, E. V., & Aravind, L. Origin and evolution of eukaryotic apoptosis: the bacterial connection. *Cell Death & Differentiation* **9**, 4, 394-404 (2002)
- 224 37. Claessen, D., Rozen, D. E., Kuipers, O. P., Søgaard-Andersen, L., & Van Wezel, G. P. Bacterial solutions to multicellularity: a tale of biofilms, filaments and fruiting bodies. *Nature Reviews*
- 225 *Microbiology* **12**, 2, 115-124 (2014)
- 226 38. Ratcliff, W. C., Denison, R. F., Borrello, M., & Travisano, M. Experimental evolution of multicellularity. *Proceedings of the National Academy of Sciences* **109**, 5, 1595-1600 (2012)

## 227 **ACKNOWLEDGEMENTS**

228 This work was partially supported by the Basic Science Research Projects of Sumitomo Foundation, the Ohsumi Frontier Science Foundation, and Japan Society for the

229 Promotion of Science (JSPS) KAKENHI (19K16070) to A.O. The authors would like to thank H. Nakaoka for his help in preparing *S. pombe* strains.

DRAFT
